# 1 The experimentally obtained functional impact assessments of GT>GC 5' splice 2 site variants differ markedly from those predicted

3  
4 Jian-Min Chen<sup>1</sup>, Jin-Huan Lin<sup>1,2,3</sup>, Emmanuelle Masson<sup>1,4</sup>, Zhuan Liao<sup>2,3</sup>, Claude Férec<sup>1,4</sup>,  
5 David N. Cooper<sup>5</sup>, Matthew Hayden<sup>5</sup>

6  
7 <sup>1</sup>EFS, Univ Brest, Inserm, UMR 1078, GGB, F-29200 Brest, France

8 <sup>2</sup>Department of Gastroenterology, Changhai Hospital, Second Military Medical University,  
9 Shanghai, China

10 <sup>3</sup>Shanghai Institute of Pancreatic Diseases, Shanghai, China

11 <sup>4</sup>CHRU Brest, Service de Génétique, Brest, France

12 <sup>5</sup>Institute of Medical Genetics, School of Medicine, Cardiff University, Cardiff, United  
13 Kingdom

14  
15 \*Correspondence:

16 Jian-Min Chen, INSERM U1078, Faculté de médecine, Bâtiment E – 2ème étage - Bureau  
17 E201b, 22 avenue Camille Desmoulins, F-29238 BREST Cedex 3, France.

18 Email: [jian-min.chen@univ-brest.fr](mailto:jian-min.chen@univ-brest.fr)

## 19 20 ABSTRACT

21 GT>GC 5' splice site (or +2T>C) variants have been frequently reported to cause human  
22 genetic disease. However, although we have demonstrated that GT>GC variants in human  
23 disease genes may not invariably be pathogenic, none of the currently available splicing  
24 prediction tools appear to be capable of reliably distinguishing those GT>GC variants that  
25 generate wild-type transcripts from those that do not. Recently, SpliceAI, a novel deep  
26 residual neural network tool, has been developed for splicing prediction. Methodologically  
27 distinct from previous approaches that either rely on human-engineered features and/or  
28 which focus on short nucleotide windows adjoining exon-intron boundaries, SpliceAI  
29 assesses splicing determinants by evaluating 10,000 nucleotides of flanking contextual  
30 sequence to predict the functional role in splicing of each position in the pre-mRNA  
31 transcript. Herein, we evaluated the performance of SpliceAI in the context of three datasets  
32 of GT>GC variants, all of which had been characterized functionally in terms of their impact  
33 on mRNA splicing. The first two datasets refer to our recently described “*in vivo*” dataset of  
34 45 disease-causing GT>GC variants and the “*in vitro*” dataset of 103 GT>GC substitutions.  
35 The third dataset comprised 12 *BRCA1* GT>GC variants that were recently analyzed by  
36 saturation genome editing. We processed all GT>GC variants using the default settings of  
37 SpliceAI. Comparison of the SpliceAI-predicted and experimentally obtained functional  
38 impact assessments of the analyzed GT>GC variants revealed that although SpliceAI  
39 performed rather better than other prediction tools, it was still far from perfect. A key issue is  
40 that the impact of GT>GC (as well as GT>GA or +2T>A) variants that generated wild-type  
41 transcripts represents a quantitative change that can vary from barely detectable to almost  
42 full expression of wild-type transcripts, with wild-type transcripts often co-existing with  
43 aberrantly spliced transcripts. Our findings highlight the challenges that we still face in  
44 attempting to accurately identify splice-altering variants.

## 45 46 KEYWORDS

47 full-length gene splicing assay, GT>GC variant, human genetic disease, *in silico* splicing  
48 prediction, *in vitro* functional analysis, mRNA splicing, SpliceAI, 5' splice site, +2T>C variant

## 49 50 1. INTRODUCTION

51 Technological advances in DNA sequencing have made whole exome sequencing and even  
52 whole genome sequencing increasingly practicable, especially in the clinical setting.  
53 However, our ability to accurately interpret the clinical relevance of genetic variants,  
54 particularly those that are rare or even private, has so far been quite limited; this represents a

55 rate-limiting step in realizing the full potential of precision medicine (Lappalainen et al., 2019;  
56 Shendure et al., 2019). Functional analysis performed in a well-validated assay should  
57 provide the strongest possible basis for variant classification (Richards et al., 2015; Starita et  
58 al., 2017) but this is often not feasible in practice for certain types of variant. Many  
59 computational algorithms have been developed with the aim of predicting the functional  
60 effects of different types of genetic variant but none of them meets the exacting standards  
61 required in the clinic. This is particularly true for splice-altering variants outside the obligate  
62 GT and AG splice-site dinucleotides because (i) splice-altering variants can occur virtually  
63 anywhere within a gene's coding or intronic sequences (Anna and Monika, 2018; Cooper et  
64 al., 2009; Scotti and Swanson, 2016; Vaz-Drago et al., 2017) and (ii) splicing is a highly  
65 regulated process, involving a complex interaction between *cis*-elements and *trans*-acting  
66 factors (Baeza-Centurion et al., 2019; Fu and Ares, 2014; Scotti and Swanson, 2016; Shi,  
67 2017; Wang and Burge, 2008).

68 Even for variants that occur within the supposedly obligate splice-site dinucleotides, we  
69 may still encounter problems of interpretation. For example, variants affecting the 5' splice  
70 site GT dinucleotide, which have been frequently reported to cause human genetic disease  
71 (Stenson et al., 2017), are routinely scored as pathogenic splicing mutations and are usually  
72 considered to be fully penetrant (Jaganathan et al., 2019; Mount et al., 2019). However, we  
73 have recently provided evidence to suggest that 5' splice site GT>GC variants (henceforth  
74 simply termed GT>GC variants or alternatively +2T>C variants) in human disease genes  
75 may not invariably be pathogenic (Lin et al., 2019b). Specifically, combining data derived  
76 from a meta-analysis of 45 human disease-causing GT>GC variants and a cell culture-based  
77 Full-Length Gene Splicing Assay (FLGSA) of 103 GT>GC substitutions, we estimated that  
78 ~15-18% of GT>GC variants generate between 1 and 84% wild-type transcripts (Lin et al.,  
79 2019b). During this analysis, we found that none of the four most popular splicing prediction  
80 tools, namely SpliceSiteFinder-like, MaxEntScan, NNSPLICE and GeneSplicer (all included  
81 within Alamut® Visual; <https://www.interactive-biosoftware.com/>), were capable of reliably  
82 distinguishing those GT>GC variants that generated wild-type transcripts from those that did  
83 not (Lin et al., 2019b); for all variants tested, SpliceSiteFinder-like tended to predict a slightly  
84 reduced score whilst the other three invariably failed to yield any score. The root of this  
85 problem is twofold: Firstly, these splicing prediction tools (in common with many others)  
86 focus exclusively on short local DNA sequence motifs and secondly, GC is used instead of  
87 GT as the wild-type 5' splice site dinucleotide in ~1% of U2 type introns in the human  
88 genome (Bursat et al., 2000; Parada et al., 2014). It follows that both GT>GC variants that  
89 generate wild-type transcripts and those that do not, could in principle occur within identical  
90 local sequence tracts as far as the conventional 9-bp 5' splice site consensus sequence,  
91 comprising the last three bases of the preceding exon and the first six bases of the affected  
92 intron (the corresponding nucleotide positions are denoted -3\_-1/+1\_+6), is concerned (Lin et  
93 al., 2019b).

94 Recently, SpliceAI, a novel deep residual neural network tool, has been developed for  
95 splicing prediction (Jaganathan et al., 2019). Methodologically distinct from previous  
96 approaches that have either relied on human-engineered features and/or focused on short  
97 nucleotide windows adjoining exon-intron boundaries, SpliceAI learns splicing determinants  
98 directly from the primary sequence by evaluating 10,000 nucleotides of the flanking  
99 sequence context to predict the role in splicing of each position in the pre-mRNA transcript.  
100 Jaganathan et al. (2019) showed that SpliceAI achieved a top-*k* accuracy of 95% for pre-  
101 mRNA transcripts of protein-coding genes and 84% for long intergenic noncoding RNAs  
102 (lincRNAs) in the test dataset. [Top-*k* accuracy is defined as the fraction of correctly  
103 predicted splice sites at the threshold where the number of predicted sites is equal to the  
104 actual number of splice sites present in the test dataset] The accuracy and reliability of  
105 SpliceAI was evidenced by (i) the observation that synonymous and intronic variants with  
106 predicted splice-altering impact were found to be depleted in the human population, (ii) the  
107 fact that 75% of these synonymous and intronic mutations were validated by RNA-seq and  
108 (iii) the finding that *de novo* cryptic splice variants were enriched in patients with  
109 neurodevelopmental disorders (Jaganathan et al., 2019). Herein, we sought to ascertain

110 whether SpliceAI is capable of accurately distinguishing GT>GC variants that generate wild-  
111 type transcripts from those that do not.

112

## 113 **2. MATERIALS AND METHODS**

### 114 **2.1. Source of GT>GC variants**

115 Three datasets of GT>GC variants, all of which have been characterized functionally in terms  
116 of their impact on splicing, were employed in this study. The first two datasets correspond to  
117 our previously described “*in vivo*” dataset of 45 disease-causing GT>GC variants and the “*in*  
118 *vitro*” dataset of 103 GT>GC substitutions (Lin et al., 2019b). The third dataset comprised 12  
119 GT>GC variants from the *BRCA1* gene, which were extracted from a recent study that  
120 prospectively analyzed the functional impact of over 4000 *BRCA1* variants by means of  
121 saturation genome editing (Findlay et al., 2018).

122 In the context of the first dataset ([Supplementary Table S1](#)), the precise level of the  
123 variant allele-derived wild-type transcripts was available for four of the seven disease-  
124 causing GT>GC variants that generated wild-type transcripts in the corresponding original  
125 publications ([Table 1](#)). For the three remaining variants (i.e., *CAV3* c.114+2T>C in (Muller et  
126 al., 2006); *PLP1* c.696+2T>C in (Aoyagi et al., 1999) and *SPINK1* c.194+2T>C in (Kume et  
127 al., 2006)), it is apparent from RT-PCR gel photographs in the original publications that all  
128 three were associated with the generation of both wild-type and aberrantly spliced  
129 transcripts. We employed ImageJ (<https://imagej.net>) to provide approximate estimates of the  
130 levels of the variant allele-derived wild-transcripts for each of the three variants ([Table 1](#)).

131

### 132 **2.2. Variant description and nomenclature**

133 Variant description and nomenclature were in line with our previous publication (Lin et al.,  
134 2019b). First, we used the term ‘variants’ to describe naturally occurring disease-causing  
135 events and ‘substitutions’ to denote artificially engineered events. Second, 5’ splice site  
136 GT>GC, GT>GA and GT>GG variants or substitutions were used synonymously with +2T>C,  
137 +2T>A and +2T>G variants or substitutions, respectively. Third, disease-causing variants  
138 were named in accordance with Human Genome Variation Society (HGVS)  
139 recommendations (den Dunnen et al., 2016) whilst the traditional IVS (InterVening  
140 Sequence; i.e., an intron) nomenclature was used for the engineered substitutions. Finally,  
141 hg38 positions (<https://genome.ucsc.edu/>) for all variants or substitutions under study are  
142 systematically provided in the various tables.

143

### 144 **2.3. SpliceAI prediction**

145 GT>GC variants or substitutions as well as their corresponding GT>GA and GT>GG  
146 counterparts were processed (during October 2019) using the default settings of SpliceAI  
147 version 1.2.1, with a custom gene annotation file containing NCBI reference sequence  
148 transcript start and end coordinates. Default settings, and instruction for use of custom  
149 annotation files, were taken from <https://pypi.org/project/spliceai/>.

150

### 151 **2.4. Performance testing**

152 Two statistical tests, a Matthews correlation coefficient (MCC) and a Receiver operating  
153 characteristic (ROC) curve, were carried out on the dataset 2 substitutions assessed by  
154 SpliceAI. MCC test is a correlation coefficient between the observed and predicted binary  
155 classifications. For a perfect prediction, the coefficient is +1; a coefficient of 0 is no better  
156 than random, and no correlation between observed and predicted yields -1 (Matthews,  
157 1975). A ROC curve illustrates the diagnostic specificity and sensitivity of a binary classifier  
158 system as its discrimination threshold is varied; this enables the selection of an optimum  
159 threshold value. To assess the difference between the diagonal and the ROC curve  
160 obtained, the area under the ROC curve is measured (AUC). An AUC of 0.5 would be a  
161 random prediction whilst a perfect predictor would score 1. ROC analysis was carried out  
162 using the R-based web tool easyROC (Goksuluk et al., 2016).

163 For the MCC test, a contingency table was derived from dataset 2 ([Supplementary Table](#)  
164 [S2](#)) where a true positive is defined as a predicted splice altering substitution for which

165 FLGSA produced no transcript and a true negative is a substitution not predicted to alter  
166 splicing and for which FLGSA produces transcript.

167

## 168 **2.5. Functional analysis of two GT-affecting variants**

169 The functional impact of two newly engineered GT-affecting variants in the *HESX1* gene  
170 were analyzed by means of the cell culture-based FLGSA method as previously described  
171 (Lin et al., 2019b).

172

## 173 **3. RESULTS AND DISCUSSION**

### 174 **3.1. Accuracy and reliability of the experimentally obtained functional assessment of 175 the GC>GT variants analyzed**

176 We employed SpliceAI to make predictions as to the splicing consequences of GT>GC  
177 variants from three distinct datasets. Since the experimentally ascertained functional impact  
178 of the GT>GC variants analyzed was used as the starting point for our analysis, their  
179 accuracy and reliability were of critical importance. Regarding the first dataset of known  
180 pathogenic variants ([Supplementary Table S1](#)), several points are worth highlighting. First, all  
181 45 disease-causing variants were either homozygotes, hemizygotes or compound  
182 heterozygotes, a prerequisite for determining the presence or absence of the variant allele-  
183 derived normal transcripts. Second, for each variant, patient-derived tissue or cells  
184 (pathologically relevant in about half of the cases) had been used to perform the RT-PCR  
185 analysis that had unequivocally demonstrated the presence or absence of variant allele-  
186 derived wild-type transcripts in the corresponding original publication. Third, the levels of the  
187 variant allele-derived wild-type transcripts in the seven disease-causing GT>GC variants that  
188 generated wild-type transcripts were very low ( $\leq 15\%$  of normal; [Table 1](#)), potentially  
189 explicable by the ascertainment bias inherent to all disease-causing variants. Nonetheless,  
190 all seven of these variants were noted to be associated with a milder clinical phenotype than  
191 would have been expected from a functionally null variant (Lin et al., 2019b), consistent with  
192 other findings that even the retention of a small fraction of normal gene function can  
193 significantly impact the clinical phenotype (Den Uijl et al., 2011; Ramalho et al., 2002;  
194 Raraigh et al., 2018; Scalet et al., 2019).

195 In the case of the second dataset ([Supplementary Table S2](#)), the functional effects of all  
196 103 engineered GT>GC substitutions (from 30 different genes) were analyzed by Full-Length  
197 Gene Splicing Assay (FLGSA) in transfected HEK293T cells (Lin et al., 2019b), with all 19  
198 substitutions that generated some wild-type transcripts being listed in [Table 2](#). By  
199 comparison to the commonly used minigene splicing assay, FLGSA preserves better the  
200 natural genomic sequence context of the studied variants (Wu et al., 2017; Zou et al., 2016).  
201 The accuracy and reliability of the FLGSA-derived data can be inferred from the following  
202 three lines of evidence. First, 10 GT>GC substitutions that generated wild-type transcripts  
203 and 10 GT>GC substitutions that did not generate wild-type transcripts in transfected  
204 HEK293T cells were further analyzed in transfected HeLa cells using FLGSA, yielding  
205 entirely consistent findings in terms of whether or not wild-type transcripts were generated  
206 (Lin et al., 2019b). Second, *HESX1* c.357+2T>C and *SPINK1* c.194+2T>C were the only  
207 variants common to both the first and second datasets. The functional effects of these two  
208 variants *in vivo* — *HESX1* c.357+2T>C generated no wild-type transcripts whereas *SPINK1*  
209 c.194+2T>C generated some wild-type transcripts ([Supplementary Table S1](#)) — were  
210 faithfully replicated in FLGSA ([Supplementary Table S2](#)). Third, a GT>GC variant that was  
211 not present in either dataset, *HBB* c.315+2T>C, had been reported to be associated with a  
212 milder hematological phenotype and it was suggested that it might have a limited impact on  
213 splicing (Frischknecht et al., 2009). Using FLGSA performed in HEK293T cells, we found that  
214 it generated a low level of wild-type transcripts (Lin et al., 2019b). Importantly, the  
215 orthologous variant of *HBB* c.315+2T>C in the rabbit *Hbb* gene has also been found to be  
216 capable of generating wild-type transcripts in two experimental model systems, namely *in*  
217 *vitro* transcription of *Hbb* RNA in a HeLa cell nuclear extract and transient expression of the  
218 full-length *Hbb* gene in HeLa cells (Aebi et al., 1986; Aebi et al., 1987). These  
219 notwithstanding, tissue- or cell-specific factors have on some occasions impacted splicing

220 (Jaganathan et al., 2019; Pineda and Bradley, 2018), an issue that was not extensively  
221 addressed in our previous study (Lin et al., 2019b). The bottom line here is that (i) the 30  
222 genes used for FLGSA analysis were selected using a procedure that did not take into  
223 consideration the gene's function or expression, (ii) all 30 genes underwent normal splicing in  
224 the context of their reference mRNA sequences as specified in [Supplementary Table S2](#) and  
225 (iii) the generation (or not) of wild-type transcripts from the engineered GC allele was  
226 observed under the same experimental conditions as for the wild-type GT allele (Lin et al.,  
227 2019b).

228 The third dataset was obtained courtesy of a perusal of the literature ([Table 3](#)). Recently,  
229 the functional impact of all possible single nucleotide substitutions within 13 exons and  
230 adjacent intronic sequences of the 23-exon *BRCA1* gene (NM\_007294.3) have been  
231 prospectively analyzed by means of saturation genome editing (Findlay et al., 2018). Taking  
232 advantage of the essentiality of *BRCA1* in the human near-haploid cell line HAP1 (Blomen et  
233 al., 2015), Findlay and colleagues used cell viability as a proxy indicator for the functional  
234 consequences of the analyzed substitutions. It should be noted that the functional  
235 consequences of all tested substitutions were actually evaluated in their natural genomic  
236 sequence contexts. Of the ~4000 *BRCA1* single nucleotide substitutions analyzed, 12 were  
237 GT>GC substitutions. Of these 12 GT>GC substitutions, one was classified as "functional",  
238 two were classified as "intermediate" and the remaining nine were classified as "non-  
239 functional" ([Table 3](#)). Whereas "functional" and "intermediate" were interpreted as having  
240 generated wild-type transcripts, "non-functional" was interpreted as having not generated any  
241 wild-type transcripts (Lin et al., 2019a). As such, 25% (n = 3) of these 12 *BRCA1* GT>GC  
242 substitutions generated wild-type transcripts, a proportion largely consistent with our  
243 estimated 15-18% rate. Moreover, the *BRCA1* GT>GC variant in intron 18 was shown to be  
244 "functional", providing further support for our contention that GT>GC variants in human  
245 disease genes may not invariably be pathogenic (Lin et al., 2019b).

246 Taken together, the experimentally obtained functional assessments of the included  
247 GC>GT variants or substitutions were considered to be of high quality and appropriate for the  
248 intended study.

249

### 250 **3.2. Selection and interpretation of SpliceAI Delta scores for analysis**

251 We processed GT>GC variants using the default settings of SpliceAI as detailed in  
252 <https://pypi.org/project/spliceai/>. SpliceAI provides Delta scores (ranging from 0 to 1) for each  
253 variant, thereby providing a measure of their probability of altering splicing in terms of either  
254 splice donor gain, splice donor loss, splice acceptor gain, and splice acceptor loss. SpliceAI  
255 also provides Delta position that conveys information specifying the location where splicing  
256 differs from normal relative to the position of the associated variant. Since the GT>GC  
257 variants or substitutions under study invariably affected the +2 position of the canonical 5'  
258 splice site GT dinucleotides (in the context of the specified mRNA reference sequence), we  
259 focused our analysis exclusively on the Delta scores of donor loss although other scores may  
260 provide clues as to the nature of the resulting aberrantly spliced transcripts of splice-altering  
261 variants. Thus, only the SpliceAI-predicted Delta scores of donor loss for the studied GT>GC  
262 variants or substitutions are provided in [Supplementary Tables S1 and S2](#) as well as in  
263 [Tables 1-3](#). Here, it is important to note two points. First, the previously studied GT>GC  
264 events generated maximally 84% wild-type transcripts as compared to their wild-type GT  
265 allele counterparts (Lin et al., 2019b). In other words, all these variants were associated  
266 minimally with a 16% functional loss. Therefore, strictly speaking, all these previously studied  
267 GT>GC events can be defined as splice-altering. Second, in those cases of GT>GC events  
268 that generated wild-type transcripts, the level of wild-type transcript varied from 1-84% (Lin et  
269 al., 2019b). Intuitively, whether or not a GT>GC variant capable of generating wild-type  
270 transcripts is pathogenic is likely to depend at least in part upon the level of the generated  
271 wild-type transcripts. Taking these points into consideration, we shall use the SpliceAI Delta  
272 score of donor loss as a proxy indicator of the probability of a given GT>GC variant being  
273 able to generate wild-type transcripts; variants with a Delta score above a certain cutoff value  
274 will be considered not to be capable of generating wild-type transcripts whereas variants with

275 a Delta score below the cutoff value will be considered as being capable of generating wild-  
276 type transcripts.

277

### 278 **3.3. Encouraging findings from a quick survey of the three datasets of GT>GC variants**

279 As mentioned in the Introduction, none of the four most popular splicing prediction tools,  
280 SpliceSiteFinder-like, MaxEntScan, NNSPLICE and GeneSplicer, were found to be able to  
281 distinguish those GT>GC variants that generated wild-type transcripts from those that did not  
282 (Lin et al., 2019b). As described below, a quick survey of SpliceAI-predicted scores yielded  
283 encouraging results across all three datasets of GT>GC variants.

284 First, in the context of dataset 1, the level of variant allele-derived wild-type transcripts  
285 associated with the seven disease-causing GT>GC variants was at most 15% of normal  
286 (Table 1). Although this low level increase in the generation of wild-type transcripts may  
287 make prediction a daunting task, it is interesting to see that the two lowest Delta scores of  
288 donor loss, 0.35 and 0.63, were observed in association with the two variants that generated  
289 ~10% wild-type transcripts (Supplementary Table S1; Table 1). The score of 0.35 was  
290 observed for the *SPINK1* c.194+2T>C variant, for which the RT-PCR analysis was performed  
291 using gastric tissue from a homozygous patient with chronic pancreatitis (Kume et al., 2006).  
292 Although stomach is not known to be clinically affected in chronic pancreatitis, the expression  
293 data were considered to be highly reliable for two reasons. Firstly, the *in vivo* expression data  
294 was confirmed by FLGSA performed in both HEK293T and HeLa cells (Lin et al., 2019b).  
295 Secondly, had the *SPINK1* c.194+2T>C variant in question caused a complete functional  
296 loss of the affected allele, the homozygotes should have developed severe infantile isolated  
297 exocrine pancreatic insufficiency instead of chronic pancreatitis (Venet et al., 2017). The  
298 score of 0.63 was observed for the *DMD* c.8027+2T>C variant, for which the detection of  
299 wild-type transcripts was based upon RT-PCR analysis of disease-affected muscle tissue  
300 from a hemizygous carrier with Becker muscular dystrophy (Bartolo et al., 1996).

301 As for the second dataset (Supplementary Table S2), the four lowest Delta scores of  
302 donor loss (i.e., 0, 0.03, 0.05 and 0.08) were all found in substitutions that generated wild-  
303 type transcripts; and 63% (n = 12) of the 19 substitutions that generated some wild-type  
304 transcripts had a Delta score of <0.80 (Table 2). As for the third dataset, the lowest Delta  
305 score, 0.53, was observed in association with the only “functional” *BRCA1* IVS18+2T>C  
306 variant (Table 3).

307

### 308 **3.4. Statistical comparison of experimentally obtained functional data with SpliceAI** 309 **predictions for the 103 engineered GT>GC splice variants (dataset 2)**

310 Dataset 2 comprised 19 substitutions that generated wild-type transcripts and 84  
311 substitutions that generated no wild-type transcripts. We thus performed two statistical tests,  
312 a Receiver operating characteristic (ROC) curve and a Matthews correlation coefficient  
313 (MCC), on the 103 substitutions assessed by SpliceAI (Supplementary Table S2) with a view  
314 both to identifying an optimum threshold value and to assessing the correlation between the  
315 FLGSA assay results and the SpliceAI predictions.

316 Based on an ROC analysis of 103 variants from dataset 2 (Supplementary Table S2), an  
317 optimum threshold point of 0.85 was provided - similar to the threshold of 0.80,  
318 recommended by SpliceAI for high precision results. A contingency table was constructed  
319 (Supplementary Table S3) to calculate values for the false positive rate, specificity,  
320 sensitivity, accuracy and the Matthews correlation coefficient. These are summarized in  
321 Table 4, along with the AUC result obtained from the ROC analysis, the curve from which is  
322 shown in Fig. 1.

323 As can be seen from Table 4, the AUC of 0.79 and the MCC score of 0.41 are indicative  
324 of a good correlation between predicted and actual results. There is also a low false positive  
325 rate whilst still maintaining a high accuracy and sensitivity. These results show that for  
326 dataset 2, at a threshold of 0.85, SpliceAI can accurately discriminate between those GT>GC  
327 substitutions which disrupt splicing and transcript production and those which do not disrupt  
328 splicing and produce transcript.

329

### 330 **3.5. Considerable discrepancy between the predicted and experimentally obtained** 331 **functional impact assessments of GT>GC 5' splice site variants**

332 Employing 0.85 as the threshold Delta score (donor loss) to define the generation of wild-  
333 type transcripts, rather variable performance between SpliceAI-predicted and experimentally  
334 demonstrated functional effects of GT>GC variants were observed across the three datasets:  
335 33-84% of the variants that generated wild-type transcripts and 67-89% of the variants that  
336 generated no wild-type transcripts were correctly predicted by SpliceAI (Table 5).

337 The poorest performance (43% (3/7) and 33% (1/3)) was observed with datasets 1 and 3  
338 variants that generated wild-type transcripts (Table 5). In the context of the seven dataset 1  
339 variants that generated wild-type transcripts (a qualitative property), the relatively poor  
340 performance of 43% might be related to the fact that the functional impact of these GT>GC  
341 variants actually manifested as rather small quantitative changes, generating between 1-15%  
342 normal transcripts (Table 1). This notwithstanding, it should be pointed out that the two  
343 disease-causing variants that generated 10-15% wild-type transcripts, *CAV3* c.114+2T>C  
344 (Muller et al., 2006) and *CD40LG* c.346+2T>C (Seyama et al., 1998), had Delta scores of  
345  $\geq 0.9$  (Table 1); and in each of these two cases, RT-PCR analysis was performed using  
346 patient-derived and pathologically relevant tissue or cells. In short, it remains unclear why  
347 some of the disease-causing variants that generated comparable levels of wild-type  
348 transcripts were predicted to have low Delta scores (i.e., *DMD* c.8027+2T>C and *SPINK1*  
349 c.194+2T>C) whereas others were predicted to have high Delta scores (i.e., *CAV3*  
350 c.114+2T>C and *CD40LG* c.346+2T>C). In the context of dataset 3 substitutions that  
351 generated wild-type transcripts, the precise levels of wild-type transcripts generated by the  
352 two "intermediate" *BRCA1* +2T>C substitutions (both had a Delta score of  $\geq 0.93$ ; Table 3)  
353 were unknown.

354 As for variants that did not generate wild-type transcripts, an excellent correlation rate,  
355 89%, was observed with the 38 such disease-causing variants. By contrast, the performance  
356 in datasets 2 and 3 variants was much lower and almost identical (68% and 67%,  
357 respectively; Table 5). A fundamental difference between dataset 1 variants and the latter  
358 two dataset substitutions is that all of the former were previously published whilst almost all  
359 of the latter were prospectively generated. Thus, it is tempting to speculate that for most of  
360 the 38 disease-causing variants that did not generate wild-type transcripts, their functional  
361 effects might have been 'seen' by SpliceAI during training, thereby leading to a higher  
362 correlation rate.

363 In an attempt to further understand the poor performance of dataset 2 and 3 substitutions  
364 that did not generate wild-type transcripts, we opted to use the corresponding +2T>A and  
365 +2T>G substitutions as controls. The underlying premise was that, based upon current  
366 knowledge, +2T>A and +2T>G variants should completely disrupt normal splicing and  
367 consequently have high Delta scores in virtually all cases (see also section 3.6). Here it is  
368 worth mentioning that we previously employed FLGSA to analyze the functional impact of 15  
369 +2T>A substitutions and 18 +2T>G substitutions, none of which generated any wild-type  
370 transcripts (Lin et al., 2019b). We processed all corresponding +2T>A and +2T>G variants  
371 by means of SpliceAI in the same way as for the +2T>C variants (during October 2019), the  
372 resulting Delta scores for donor loss being provided in Tables 1-3 and Supplementary Tables  
373 S1 and S2.

374 As shown in Supplementary Table S1, all +2T>A and +2T>G variants corresponding to  
375 the 45 disease-causing +2T>C variants had very high Delta scores, ranging from 0.92 to 1.  
376 By contrast, 91% (n = 94) of the +2T>A and +2T>G variants corresponding to the 103  
377 dataset 2 +2T>C substitutions had a Delta score of  $\geq 0.85$  (Supplementary Table S2). In other  
378 words, nine of the 103 +2T sites were predicted to have a Delta score of  $< 0.85$  when  
379 substituted by either A or G; and in these sites, the Delta scores are often identical for all  
380 three possible substitutions (Table 6). One possible reason for lower than expected Delta  
381 scores is provided in (Jaganathan et al., 2019); exons which undergo a substantial degree of  
382 alternative splicing, defined as being between 10% and 90% exon inclusion averaged across  
383 samples, tend towards intermediate scores (stated as between 0.35 and 0.8). We therefore  
384 explored this possibility using the two sites for which all possible substitutions had the lowest

385 Delta scores (i.e., 0.59 and 0.3; [Table 6](#)) as examples. To this end, alternative transcripts of  
386 the genes of interest were surveyed via <https://www.ncbi.nlm.nih.gov/gene/>.

387 All three possible single nucleotide substitutions in the *RPL11* g.23695910T (IVS5+2T in  
388 accordance with NM\_000975.5) site had an identical Delta score of 0.59. *RPL11* has two  
389 transcripts, the other being NM\_001199802.1. Nonetheless, the two transcripts have  
390 common coding sequences from exons 3-6. Moreover, all three possible single nucleotide  
391 substitutions in the NM\_000975.5-defined *RPL11* IVS5+2T site have been previously  
392 subjected to FLGSA, invariably generating no wild-type transcripts (Lin et al., 2019b). Taken  
393 together, in this particular case, the lower than expected Delta scores cannot be adequately  
394 explained by alternative splicing.

395 All three possible single nucleotide substitutions in the *LY6G6F* g.31708136T (IVS5+2T in  
396 accordance with NM\_001003693.1) site had a score of 0.3 ([Table 6](#)). NM\_001003693.1-  
397 defined *LY6G6F* has sequence from exons 1 to 4 in common with NM\_001353334.2-defined  
398 *LY6G6F-LY6G6D*, which represents naturally occurring readthrough transcription between  
399 the neighboring *LY6G6F* and *LY6G6D* genes on chromosome 6 ([Supplementary Fig. S1](#)). By  
400 contrast, NM\_001003693.1-defined exons 5 and 6 are spliced out in NM\_001353334.2-  
401 defined *LY6G6F-LY6G6D*. It is likely that the use of the “*LY6G6F* IVS5+2T site” as a splice  
402 site in one transcript isoform but not in the other underlies the similarly low Delta scores for  
403 the three above mentioned possible single nucleotide substitutions. However, two points  
404 should be emphasized here. Firstly, none of the three possible single nucleotide substitutions  
405 in the context of the NM\_001003693.1-defined *LY6G6F* IVS5+2T site led to the generation of  
406 wild-type transcripts as evidenced by FLGSA. Whether these substitutions would lead to the  
407 increased use of NM\_001353334.2-defined *LY6G6F-LY6G6D* remains unclear. Secondly, all  
408 three possible single nucleotide substitutions, if considered only in the context of  
409 NM\_001353334.2-defined *LY6G6F-LY6G6D* ([Supplementary Fig. S1](#)), may not affect gene  
410 splicing at all.

411 Finally, let us turn our attention to the *BRCA1* findings in relation to NM\_007294.3 ([Table](#)  
412 [3](#)). The lowest Delta score of donor loss in the context of +2T>A and +2T>G variants, 0.65,  
413 was observed for all three possible SNVs in the *BRCA1* IVS4+2T site. The next lowest score,  
414 0.67, was observed for all three possible SNVs in the *BRCA1* IVS5+2T site ([Table 3](#)). All six  
415 of these variants have been analyzed using saturation genome editing and were invariably  
416 classified as “non-functional” (Jaganathan et al., 2019). Moreover, although *BRCA1* has  
417 multiple transcripts, these two introns are used by all transcripts ([Supplementary Fig. S2](#)).  
418 Therefore, as in the abovementioned *RPL11* case, these lower than expected Delta scores  
419 cannot be adequately explained by alternative splicing.

420

### 421 **3.6. Additional findings**

422 We succeeded in analyzing two additional engineered GT-impacting substitutions in the  
423 *HESX1* gene, IVS2+2T>A (hg38# chr3:57198751A>T) and IVS3+2T>G (hg38#  
424 chr3:57198389A>C), using the cell culture-based FLGSA method. Interestingly, the  
425 IVS2+2T>A substitution generated both wild-type and aberrant transcripts whereas  
426 IVS3+2T>G generated only aberrant transcripts ([Fig. 2](#)). Moreover, two of the 12 *BRCA1*  
427 +2T>A substitutions, IVS16+2T>A and IVS18+2T>A, were described as being “intermediate”  
428 ([Table 3](#)). Although no disease-causing +2T>A variants have been found to generate wild-  
429 type transcripts, GA has recently been ranked fourth in terms of its relative frequency among  
430 the six noncanonical 5' splice sites identified by genome-wide RNA-seq analysis and splicing  
431 reporter assays (Erkelenz et al., 2018). However, of the three +2T>A substitutions that were  
432 experimentally shown to generate some wild-type transcripts, two were predicted to have a  
433 Delta score of >0.85, namely 0.93 for *HESX1* IVS2+2T>A ([Supplementary Table S2](#)) and  
434 0.98 for *BRCA1* IVS18+2T>A ([Table 3](#)). The other one, *BRCA1* IVS16+2T>A, was predicted  
435 to have a Delta score of 0.74; but an identical score was also predicted for *BRCA1*  
436 IVS16+2T>C and IVS16+2T>G, both of which were classified as “non-functional” ([Table 3](#)).  
437 In short, SpliceAI appeared not to work as well for the +2T>A variants that generated wild-  
438 type transcripts as for the +2T>C variants that generated wild-type transcripts.

439



#### 440 **4. CONCLUSIONS AND PERSPECTIVES**

441 In the present study, we attempted to correlate SpliceAI-predicted and experimentally  
442 obtained functional effects of GT>GC variants in the context of three independent and  
443 complementary datasets. Employing data from dataset 2 substitutions, we were able to  
444 propose a Delta score of donor loss, 0.85, as defining the threshold of whether or not wild-  
445 type transcripts would be generated by GT>GC variants; whereas a score of  $\geq 0.85$  defines  
446 the complete absence of wild-type transcripts, a score of  $< 0.85$  defines the generation of at  
447 least some wild-type transcripts. Subsequent use of this threshold score to correlate  
448 SpliceAI-predicted and experimentally obtained functional effects of the GT>GC variants  
449 revealed that SpliceAI performed better than the popular prediction tools such as  
450 SpliceSiteFinder-like, MaxEntScan, NNSPLICE and GeneSplicer. However, a considerable  
451 discrepancy still existed between SpliceAI-predicted and experimentally obtained functional  
452 assessments in relation to GT>GC (as well as GT>GA) variants. Indeed, this discrepancy  
453 serves to illuminate the challenges ahead in accurately identifying all splice-altering variants.  
454 A key issue here is that the impact of GT>GC (as well as GT>GA) variants that generated  
455 wild-type transcripts represents a quantitative change that can vary from barely detectable to  
456 almost full expression of wild-type transcripts, with wild-type transcripts often co-existing with  
457 aberrantly spliced transcripts. This is also the case for most of the splice-altering variants  
458 occurring outside the essential splice site dinucleotides, whose effects “are not fully  
459 penetrant and a mixture of both normal and aberrant splice isoforms are produced”  
460 (Jaganathan et al., 2019). Moreover, there is also the issue of alternative splicing related to  
461 tissue- or cell-specific factors. While it is clear that we are still very far acquiring a full  
462 understanding of the ‘splicing code’ (Bao et al., 2019), we are of the opinion that any  
463 improvement in the prioritization of splicing variants will necessitate the refinement of *in silico*  
464 prediction tools by reference to *in vitro* functional assessment courtesy of the results  
465 obtained from well-validated assays such as FLGSA.

#### 467 **ACKNOWLEDGMENTS**

468 We are grateful to the original authors who reported the disease-causing 5' splice site  
469 GT>GC variants studied here. J.H.L. was in receipt of a 20-month scholarship from the China  
470 Scholarship Council (No. 201706580018). This study was supported by the Institut National  
471 de la Santé et de la Recherche Médicale (INSERM), France. D.N.C. and M.H. acknowledge  
472 the financial support of Qiagen plc through a License Agreement with Cardiff University.

#### 474 **REFERENCES**

- 475 Aebi M, Hornig H, Padgett RA, Reiser J, Weissmann C. Sequence requirements for splicing  
476 of higher eukaryotic nuclear pre-mRNA. *Cell* 1986; **47**: 555-565.
- 477 Aebi M, Hornig H, Weissmann C. 5' cleavage site in eukaryotic pre-mRNA splicing is  
478 determined by the overall 5' splice region, not by the conserved 5' GU. *Cell* 1987; **50**:  
479 237-246.
- 480 Anna A, Monika G. Splicing mutations in human genetic disorders: examples, detection, and  
481 confirmation. *J Appl Genet* 2018; **59**: 253-268.
- 482 Aoyagi Y, Kobayashi H, Tanaka K, Ozawa T, Nitta H, Tsuji S. A de novo splice donor site  
483 mutation causes in-frame deletion of 14 amino acids in the proteolipid protein in  
484 Pelizaeus-Merzbacher disease. *Ann Neurol* 1999; **46**: 112-115.
- 485 Baeza-Centurion P, Minana B, Schmiedel JM, Valcarcel J, Lehner B. Combinatorial genetics  
486 reveals a scaling law for the effects of mutations on splicing. *Cell* 2019; **176**: 549-563  
487 e523.
- 488 Bao S, Moakley DF, Zhang C. The splicing code goes deep. *Cell* 2019; **176**: 414-416.
- 489 Bartolo C, Papp AC, Snyder PJ, Sedra MS, Burghes AH, Hall CD, Mendell JR, Prior TW. A  
490 novel splice site mutation in a Becker muscular dystrophy patient. *J Med Genet* 1996;  
491 **33**: 324-327.
- 492 Blomen VA, Majek P, Jae LT, Bigenzahn JW, Nieuwenhuis J, Staring J, Sacco R, van  
493 Diemen FR, Olk N, Stukalov A, Marceau C, Janssen H, Carette JE, Bennett KL, Colinge

- 494 J, Superti-Furga G, Brummelkamp TR. Gene essentiality and synthetic lethality in  
495 haploid human cells. *Science* 2015; **350**: 1092-1096.
- 496 Burset M, Seledtsov IA, Solovyev VV. Analysis of canonical and non-canonical splice sites in  
497 mammalian genomes. *Nucleic Acids Res* 2000; **28**: 4364-4375.
- 498 Cooper TA, Wan L, Dreyfuss G. RNA and disease. *Cell* 2009; **136**: 777-793.
- 499 den Dunnen JT, Dagleish R, Maglott DR, Hart RK, Greenblatt MS, McGowan-Jordan J,  
500 Roux AF, Smith T, Antonarakis SE, Taschner PE. HGVS Recommendations for the  
501 Description of Sequence Variants: 2016 Update. *Hum Mutat* 2016; **37**: 564-569.
- 502 Den Uijl IE, Mauser Bunschoten EP, Roosendaal G, Schutgens RE, Biesma DH, Grobbee  
503 DE, Fischer K. Clinical severity of haemophilia A: does the classification of the 1950s still  
504 stand? *Haemophilia* 2011; **17**: 849-853.
- 505 Erkelenz S, Theiss S, Kaisers W, Ptok J, Walotka L, Muller L, Hillebrand F, Brillen AL,  
506 Sladek M, Schaal H. Ranking noncanonical 5' splice site usage by genome-wide RNA-  
507 seq analysis and splicing reporter assays. *Genome Res* 2018; **28**: 1826-1840.
- 508 Findlay GM, Daza RM, Martin B, Zhang MD, Leith AP, Gasperini M, Janizek JD, Huang X,  
509 Starita LM, Shendure J. Accurate classification of *BRCA1* variants with saturation  
510 genome editing. *Nature* 2018; **562**: 217-222.
- 511 Frischknecht H, Dutly F, Walker L, Nakamura-Garrett LM, Eng B, Waye JS. Three new beta-  
512 thalassemia mutations with varying degrees of severity. *Hemoglobin* 2009; **33**: 220-225.
- 513 Fu XD, Ares M, Jr. Context-dependent control of alternative splicing by RNA-binding  
514 proteins. *Nat Rev Genet* 2014; **15**: 689-701.
- 515 Goksuluk D, Korkmaz S, Zararsiz G, Karaagaoglu AE. easyROC: an interactive web-tool for  
516 ROC curve analysis using R language environment. *The R Journal* 2016; **8**: 213-230.
- 517 Jaganathan K, Kyriazopoulou Panagiotopoulou S, McRae JF, Darbandi SF, Knowles D, Li  
518 YI, Kosmicki JA, Arbelaez J, Cui W, Schwartz GB, Chow ED, Kanterakis E, Gao H, Kia  
519 A, Batzoglou S, Sanders SJ, Farh KK. Predicting splicing from primary sequence with  
520 deep learning. *Cell* 2019; **176**: 535-548 e524.
- 521 Kume K, Masamune A, Kikuta K, Shimosegawa T. [-215G>A; IVS3+2T>C] mutation in the  
522 *SPINK1* gene causes exon 3 skipping and loss of the trypsin binding site. *Gut* 2006; **55**:  
523 1214.
- 524 Lappalainen T, Scott AJ, Brandt M, Hall IM. Genomic analysis in the age of human genome  
525 sequencing. *Cell* 2019; **177**: 70-84.
- 526 Lin JH, Masson E, Boulling A, Hayden M, Cooper DN, Férec C, Liao Z, Chen JM. 5' splice  
527 site GC>GT variants differ from GT>GC variants in terms of their functionality and  
528 pathogenicity. bioRxiv 829010; doi: <https://doi.org/10.1101/829010>. 2019a.
- 529 Lin JH, Tang XY, Boulling A, Zou WB, Masson E, Fichou Y, Raud L, Le Tertre M, Deng SJ,  
530 Berlivet I, Ka C, Mort M, Hayden M, Lemar R, Houdayer C, Le Gac G, Cooper DN, Li  
531 ZS, Férec C, Liao Z, Chen JM. First estimate of the scale of canonical 5' splice site  
532 GT>GC variants capable of generating wild-type transcripts. *Hum Mutat* 2019b; **40**:  
533 1856-1873.
- 534 Matthews BW. Comparison of the predicted and observed secondary structure of T4 phage  
535 lysozyme. *Biochim Biophys Acta* 1975; **405**: 442-451.
- 536 Mount SM, Avsec Z, Carmel L, Casadio R, Celik MH, Chen K, Cheng J, Cohen NE,  
537 Fairbrother WG, Fenesh T, Gagneur J, Gotea V, Holzer T, Lin CF, Martelli PL, Naito T,  
538 Nguyen TYD, Savojardo C, Unger R, Wang R, Yang Y, Zhao H. Assessing predictions of  
539 the impact of variants on splicing in CAGI5. *Hum Mutat* 2019; **40**: 1215-1224.
- 540 Muller JS, Piko H, Schoser BG, Schlotter-Weigel B, Reilich P, Gurster S, Born C, Karcagi V,  
541 Pongratz D, Lochmuller H, Walter MC. Novel splice site mutation in the caveolin-3 gene  
542 leading to autosomal recessive limb girdle muscular dystrophy. *Neuromuscul Disord*  
543 2006; **16**: 432-436.
- 544 Parada GE, Munita R, Cerda CA, Gysling K. A comprehensive survey of non-canonical  
545 splice sites in the human transcriptome. *Nucleic Acids Res* 2014; **42**: 10564-10578.
- 546 Pineda JMB, Bradley RK. Most human introns are recognized via multiple and tissue-specific  
547 branchpoints. *Genes Dev* 2018; **32**: 577-591.

- 548 Ramalho AS, Beck S, Meyer M, Penque D, Cutting GR, Amaral MD. Five percent of normal  
549 cystic fibrosis transmembrane conductance regulator mRNA ameliorates the severity of  
550 pulmonary disease in cystic fibrosis. *Am J Respir Cell Mol Biol* 2002; **27**: 619-627.
- 551 Raraigh KS, Han ST, Davis E, Evans TA, Pellicore MJ, McCague AF, Joynt AT, Lu Z, Atalar  
552 M, Sharma N, Sheridan MB, Sosnay PR, Cutting GR. Functional assays are essential for  
553 interpretation of missense variants associated with variable expressivity. *Am J Hum  
554 Genet* 2018; **102**: 1062-1077.
- 555 Richards S, Aziz N, Bale S, Bick D, Das S, Gastier-Foster J, Grody WW, Hegde M, Lyon E,  
556 Spector E, Voelkerding K, Rehm HL, Committee ALQA. Standards and guidelines for the  
557 interpretation of sequence variants: a joint consensus recommendation of the American  
558 College of Medical Genetics and Genomics and the Association for Molecular Pathology.  
559 *Genet Med* 2015; **17**: 405-424.
- 560 Scalet D, Maestri I, Branchini A, Bernardi F, Pinotti M, Balestra D. Disease-causing variants  
561 of the conserved +2T of 5' splice sites can be rescued by engineered U1snRNAs. *Hum  
562 Mutat* 2019; **40**: 48-52.
- 563 Scotti MM, Swanson MS. RNA mis-splicing in disease. *Nat Rev Genet* 2016; **17**: 19-32.
- 564 Seyama K, Nonoyama S, Gangsaas I, Hollenbaugh D, Pabst HF, Aruffo A, Ochs HD.  
565 Mutations of the CD40 ligand gene and its effect on CD40 ligand expression in patients  
566 with X-linked hyper IgM syndrome. *Blood* 1998; **92**: 2421-2434.
- 567 Shendure J, Findlay GM, Snyder MW. Genomic medicine-progress, pitfalls, and promise.  
568 *Cell* 2019; **177**: 45-57.
- 569 Shi Y. Mechanistic insights into precursor messenger RNA splicing by the spliceosome. *Nat  
570 Rev Mol Cell Biol* 2017; **18**: 655-670.
- 571 Starita LM, Ahituv N, Dunham MJ, Kitzman JO, Roth FP, Seelig G, Shendure J, Fowler DM.  
572 Variant interpretation: functional assays to the rescue. *Am J Hum Genet* 2017; **101**: 315-  
573 325.
- 574 Stenson PD, Mort M, Ball EV, Evans K, Hayden M, Heywood S, Hussain M, Phillips AD,  
575 Cooper DN. The Human Gene Mutation Database: towards a comprehensive repository  
576 of inherited mutation data for medical research, genetic diagnosis and next-generation  
577 sequencing studies. *Hum Genet* 2017; **136**: 665-677.
- 578 Vaz-Drago R, Custodio N, Carmo-Fonseca M. Deep intronic mutations and human disease.  
579 *Hum Genet* 2017; **136**: 1093-1111.
- 580 Venet T, Masson E, Talbotec C, Billiemaz K, Touraine R, Gay C, Destombe S, Cooper DN,  
581 Patural H, Chen JM, Férec C. Severe infantile isolated exocrine pancreatic insufficiency  
582 caused by the complete functional loss of the *SPINK1* gene. *Hum Mutat* 2017; **38**: 1660-  
583 1665.
- 584 Wang Z, Burge CB. Splicing regulation: from a parts list of regulatory elements to an  
585 integrated splicing code. *RNA* 2008; **14**: 802-813.
- 586 Wu H, Boulling A, Cooper DN, Li ZS, Liao Z, Chen JM, Férec C. *In vitro* and *in silico*  
587 evidence against a significant effect of the *SPINK1* c.194G>A variant on pre-mRNA  
588 splicing. *Gut* 2017; **66**: 2195-2196.
- 589 Zou WB, Boulling A, Masson E, Cooper DN, Liao Z, Li ZS, Férec C, Chen JM. Clarifying the  
590 clinical relevance of *SPINK1* intronic variants in chronic pancreatitis. *Gut* 2016; **65**: 884-  
591 886.

592

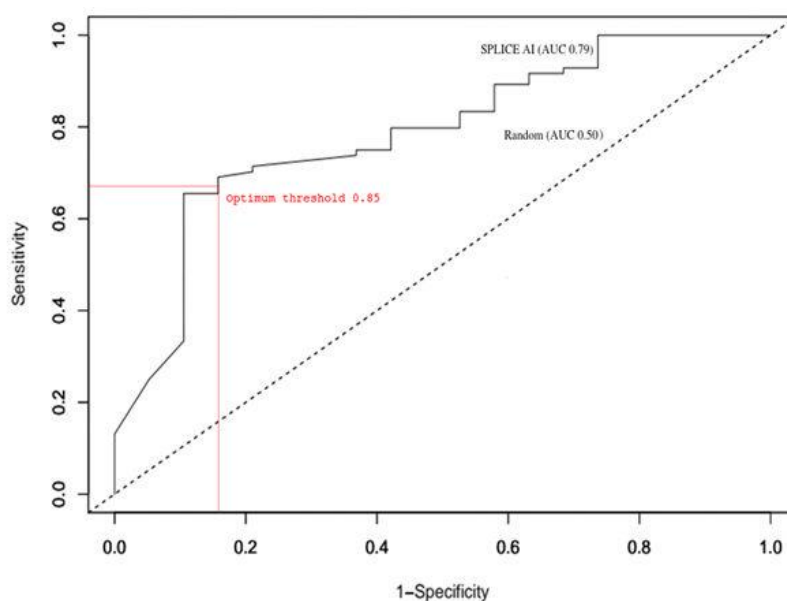

593  
594 **Figure 1.** A receiver operating characteristic (ROC) curve for the SpliceAI predictions  
595 generated from dataset 2 (Supplementary Table S2), with dotted diagonal line indicating a  
596 random prediction (0.5 AUC) and the solid line showing SpliceAI prediction performance (0.79  
597 AUC). The intersection between the two represents the optimum threshold.

598  
599  
600  
601  
602  
603  
604  
605  
606

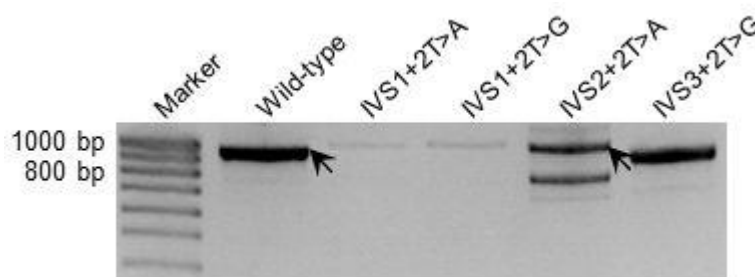

607  
608 **Figure 2.** RT-PCR analyses of HEK293T cells transfected with full-length *HESX1* gene  
609 expression constructs carrying respectively the wild-type and four different nucleotide  
610 substitutions. Wild-type transcripts emanating from the wild-type construct and the construct  
611 containing the IVS2+2T>A substitution (confirmed by DNA sequencing) are indicated by  
612 arrows. IVS2+2T>A (hg38# chr3:57198751A>T) and IVS3+2T>G (hg38# chr3:57198389A>C)  
613 substitutions were newly analyzed here. IVS1+2T>A and IVS1+2T>G, which had been  
614 previously analyzed (Lin et al., 2019b), are included for the sake of comparison.

615 **Table 1.** Comparison of SpliceAI-predicted and experimentally demonstrated functional effects of the seven disease-causing GT>GC (+2T>C)  
 616 variants that generated wild-type transcripts

| Gene symbol    | mRNA reference | Chromosome | HG38 coordinate | Reference sequence | Variant <sup>a</sup>    | % normal expression level <sup>b</sup> | SpliceAI Delta score of donor loss |       |       |
|----------------|----------------|------------|-----------------|--------------------|-------------------------|----------------------------------------|------------------------------------|-------|-------|
|                |                |            |                 |                    |                         |                                        | +2T>C                              | +2T>A | +2T>G |
| <i>CAV3</i>    | NM_001234.4    | 3          | 8733992         | T                  | c.114+2T>C              | 11 <sup>c</sup>                        | 0.9                                | 1     | 1     |
| <i>CD3E</i>    | NM_000733.3    | 11         | 118313876       | T                  | c.520+2T>C              | 1-5 <sup>d</sup>                       | 0.99                               | 0.99  | 0.99  |
| <i>CD40LG</i>  | NM_000074.2    | X          | 136654432       | T                  | c.346+2T>C              | 15 <sup>d</sup>                        | 0.95                               | 0.97  | 0.97  |
| <i>DMD</i>     | NM_004006.2    | X          | 31657988        | A                  | c.8027+2T>C             | 10 <sup>d</sup>                        | 0.63                               | 0.99  | 0.99  |
| <i>PLP1</i>    | NM_000533.4    | X          | 103788512       | T                  | c.696+2T>C              | 8 <sup>c</sup>                         | 0.74                               | 1     | 1     |
| <i>SLC26A2</i> | NM_000112.3    | 5          | 149960981       | T                  | c.-26+2T>C              | 5 <sup>d</sup>                         | 0.9                                | 0.99  | 0.99  |
| <i>SPINK1</i>  | NM_003122.3    | 5          | 147828020       | A                  | c.194+2T>C <sup>e</sup> | 10 <sup>c</sup>                        | 0.35                               | 0.99  | 1     |

617 <sup>a</sup>Nomenclature in accordance with Human Genome Variation Society (HGVS) recommendations (den Dunnen et al., 2016).

618 <sup>b</sup>Expressed as the level of the variant allele-derived wild-type transcripts relative to that of the wild-type allele-derived wild-type transcripts.

619 <sup>c</sup>Expression level determined here by ImageJ using gel photos from the original publications.

620 <sup>d</sup>Expression level as described in the original publications.

621 <sup>e</sup>Identical to the *SPINK1* IVS3+2T>C substitution in Table 2.

622

623 **Table 2.** Comparison of SpliceAI-predicted and experimentally demonstrated functional effects of the 19 engineered GT>GC (+2T>C)  
 624 substitutions that generated wild-type transcripts

| Gene symbol    | mRNA reference | Chromosome | hg38 coordinate | Reference sequence | Substitution <sup>a</sup> | Generation of wild-type transcripts <sup>b</sup> | SpliceAI Delta score of donor loss |       |       |
|----------------|----------------|------------|-----------------|--------------------|---------------------------|--------------------------------------------------|------------------------------------|-------|-------|
|                |                |            |                 |                    |                           |                                                  | +2T>C                              | +2T>A | +2T>G |
| <i>CCDC103</i> | NM_213607.2    | 17         | 44899861        | T                  | IVS1+2T>C                 | Yes                                              | 0.82                               | 0.82  | 0.82  |
| <i>DBI</i>     | NM_001079862.2 | 2          | 119368307       | T                  | IVS2+2T>C                 | Yes                                              | 0.86                               | 1     | 1     |
| <i>DNAJC19</i> | NM_145261.3    | 3          | 180985924       | A                  | IVS5+2T>C                 | Yes (42%)                                        | 0.03                               | 0.99  | 0.95  |
| <i>FATE1</i>   | NM_033085.2    | X          | 151716227       | T                  | IVS1+2T>C                 | Yes (84%)                                        | 0.08                               | 0.96  | 1     |
| <i>FOLR3</i>   | NM_000804.3    | 11         | 72139484        | T                  | IVS4+2T>C                 | Yes                                              | 0.45                               | 1     | 1     |
| <i>HESX1</i>   | NM_003865.2    | 3          | 57199760        | A                  | IVS1+2T>C                 | Yes (2%)                                         | 0.81                               | 0.98  | 0.98  |
| <i>IFNL2</i>   | NM_172138.1    | 19         | 39269823        | T                  | IVS5+2T>C                 | Yes (5%)                                         | 0.05                               | 0.84  | 0.73  |
| <i>IL10</i>    | NM_000572.3    | 1          | 206770905       | A                  | IVS3+2T>C                 | Yes                                              | 0.61                               | 1     | 1     |
| <i>MGP</i>     | NM_000900.4    | 12         | 14884211        | A                  | IVS2+2T>C                 | Yes (80%)                                        | 0.97                               | 0.99  | 0.99  |
| <i>PSMC5</i>   | NM_001199163.1 | 17         | 63830503        | T                  | IVS6+2T>C                 | Yes (56%)                                        | 0.31                               | 0.98  | 1     |
|                |                |            | 63831228        | T                  | IVS8+2T>C                 | Yes (56%)                                        | 0.21                               | 1     | 1     |
|                |                |            | 63831618        | T                  | IVS10+2T>C                | Yes (46%)                                        | 0.83                               | 1     | 1     |
| <i>RPL11</i>   | NM_000975.5    | 1          | 23692761        | T                  | IVS2+2T>C                 | Yes                                              | 0                                  | 0.87  | 0.86  |
|                |                |            | 23693915        | T                  | IVS3+2T>C                 | Yes                                              | 0.74                               | 1     | 1     |
| <i>RPS27</i>   | NM_001030.4    | 1          | 153991225       | T                  | IVS2+2T>C                 | Yes (63%)                                        | 0.67                               | 1     | 1     |
|                |                |            | 153991678       | T                  | IVS3+2T>C                 | Yes                                              | 0.98                               | 1     | 1     |
| <i>SELENOS</i> | NM_203472.2    | 15         | 101277340       | A                  | IVS1+2T>C                 | Yes                                              | 0.81                               | 1     | 1     |
|                |                |            | 101274418       | A                  | IVS5+2T>C                 | Yes (14%)                                        | 0.79                               | 1     | 1     |
| <i>SPINK1</i>  | NM_003122.3    | 5          | 147828020       | A                  | IVS3+2T>C <sup>c</sup>    | Yes                                              | 0.35                               | 0.99  | 1     |

625 <sup>a</sup>In accordance with the traditional IVS (InterVening Sequence; i.e., an intron) nomenclature as previously described (Lin et al. 2019b).

626 <sup>b</sup>Expression level (in parentheses), determined by quantitative RT-PCR analysis, was available for all +2T>C substitutions that generated only  
 627 wild-type transcripts under the experimental conditions described in (Lin et al. 2019b).

628 <sup>c</sup>Identical to the *SPINK1* c.194+2T>C variant in Supplementary Table S1 and Table 1.

629

630

631

632 **Table 3.** Comparison of SpliceAI-predicted and experimentally demonstrated functional effects of all possible single nucleotide substitutions in  
 633 the +2 positions of 12 *BRCA1* introns\*

| Intron <sup>a</sup> | HG38 coordinate | Reference sequence | +2T>C                                  |                          | +2T>A                     |                          | +2T>G                     |                          |
|---------------------|-----------------|--------------------|----------------------------------------|--------------------------|---------------------------|--------------------------|---------------------------|--------------------------|
|                     |                 |                    | Functional classification <sup>b</sup> | Delta score (donor loss) | Functional classification | Delta score (donor loss) | Functional classification | Delta score (donor loss) |
| 2                   | 43124015        | A                  | Non-functional                         | 0.9                      | Non-functional            | 0.9                      | Non-functional            | 0.9                      |
| 3                   | 43115724        | A                  | Non-functional                         | 0.97                     | Non-functional            | 0.98                     | Non-functional            | 0.98                     |
| 4                   | 43106454        | A                  | Non-functional                         | 0.65                     | Non-functional            | 0.65                     | Non-functional            | 0.65                     |
| 5                   | 43104866        | A                  | Non-functional                         | 0.67                     | Non-functional            | 0.67                     | Non-functional            | 0.67                     |
| 15                  | 43070926        | A                  | Non-functional                         | 0.99                     | Non-functional            | 0.99                     | Non-functional            | 0.99                     |
| 16                  | 43067606        | A                  | Non-functional                         | 0.74                     | Intermediate              | 0.74                     | Non-functional            | 0.74                     |
| 17                  | 43063872        | A                  | Non-functional                         | 0.9                      | Non-functional            | 0.9                      | Non-functional            | 0.9                      |
| 18                  | 43063331        | A                  | Functional                             | 0.53                     | Intermediate              | 0.98                     | Non-functional            | 0.98                     |
| 19                  | 43057050        | A                  | Non-functional                         | 0.82                     | Non-functional            | 1                        | Non-functional            | 1                        |
| 20                  | 43051061        | A                  | Non-functional                         | 0.9                      | Non-functional            | 0.99                     | Non-functional            | 0.99                     |
| 21                  | 43049119        | A                  | Intermediate                           | 0.96                     | Non-functional            | 0.99                     | Non-functional            | 0.99                     |
| 22                  | 43047641        | A                  | Intermediate                           | 0.93                     | Non-functional            | 0.93                     | Missing data              | 0.93                     |

634 \*Experimental data were extracted from Findlay et al. (2018).

635 <sup>a</sup>In accordance with NM\_007294.3.

636 <sup>b</sup>“Non-functional” was interpreted as meaning that no wild-type transcripts were generated whereas “functional” and “intermediate” were held to  
 637 imply the generation of wild-type transcripts.

638 **Table 4.** Performance metrics of SpliceAI as a predictor for splice site disruption on 103  
639 variants from dataset 2

| False positive rate | True positive rate (sensitivity) | True negative rate (specificity) | Accuracy | AUC  | MCC  |
|---------------------|----------------------------------|----------------------------------|----------|------|------|
| 16%                 | 67%                              | 84%                              | 70%      | 0.79 | 0.41 |

640

641

642

643

644

645

646

647

648

649

650 **Table 5.** Overall correlation rates between SpliceAI-predicted and experimentally  
651 demonstrated functional effects of the GT>GC variants in the context of three datasets\*

| <b>Variants generating wild-type transcripts</b>                           |             |
|----------------------------------------------------------------------------|-------------|
| Dataset 1 (45 disease-causing variants)                                    | 43% (3/7)   |
| Dataset 2 (103 variants analyzed by FLGSA)                                 | 84% (16/19) |
| Dataset 3 (12 <i>BRCA1</i> variants analyzed by saturation genome editing) | 33% (1/3)   |
| <b>Variants generating no wild-type transcripts</b>                        |             |
| Dataset 1 (45 disease-causing variants)                                    | 89% (34/38) |
| Dataset 2 (103 variants analyzed by FLGSA)                                 | 68% (57/84) |
| Dataset 3 (12 <i>BRCA1</i> variants analyzed by saturation genome editing) | 67% (6/9)   |

652 \*Splice AI Delta score (donor loss) of 0.85 was used as the threshold value for defining the  
653 generation of wild-type transcripts or not.



**Table 6.** Nine +2T positions for which all three possible nucleotide substitutions had a consistent SpliceAI Delta score of <0.85

| Gene symbol    | mRNA reference | Chromosome | hg38 coordinate | Reference sequence | SpliceAI Delta score of donor loss |       |       |
|----------------|----------------|------------|-----------------|--------------------|------------------------------------|-------|-------|
|                |                |            |                 |                    | +2T>C                              | +2T>A | +2T>G |
| <i>AURKC</i>   | NM_001015878.1 | 19         | 57235060        | T                  | 0.8                                | 0.8   | 0.8   |
| <i>CCDC103</i> | NM_213607.2    | 17         | 44899861        | T                  | 0.82                               | 0.82  | 0.82  |
| <i>FABP7</i>   | NM_001446.4    | 6          | 122779869       | T                  | 0.83                               | 0.84  | 0.84  |
| <i>IFNL2</i>   | NM_172138.1    | 19         | 39269823        | T                  | 0.05                               | 0.84  | 0.73  |
| <i>LY6G6F</i>  | NM_001003693.1 | 6          | 31708136        | T                  | 0.81                               | 0.81  | 0.81  |
|                |                |            | 31710420        | T                  | 0.3                                | 0.3   | 0.3   |
| <i>PSMC5</i>   | NM_001199163.1 | 17         | 63830191        | T                  | 0.76                               | 0.77  | 0.77  |
| <i>RPL11</i>   | NM_000975.5    | 1          | 23695910        | T                  | 0.59                               | 0.59  | 0.59  |
| <i>SELENOS</i> | NM_203472.2    | 15         | 101272762       | A                  | 0.64                               | 0.64  | 0.64  |
